# Supplementary material
Source: ML conference proceedings conference paper supplement (https://proceedings.neurips.cc/paper_files/paper/2023/hash/04e05ba5cbc36044f6499d1edf15247e-Abstract.html)
Supplement: Supplementary file 1 [file 04e05ba5cbc36044f6499d1edf15247e-Supplemental-Conference.pdf]

# Partial Multi-Label Learning with Probabilistic Graphical Disambiguation

## Supplementary Material

Jun-Yi Hang, Min-Ling Zhang\*

School of Computer Science and Engineering, Southeast University, Nanjing 210096, China  
 Key Laboratory of Computer Network and Information Integration (Southeast University),  
 Ministry of Education, China  
 {hangjy, zhangml}@seu.edu.cn

### Appendix A

#### More Experimental Results for Comparative Studies

Table A.1, A.2 and A.3 report detailed experimental results in terms of *Coverage*, *One-error* and *Hamming loss*, which are not covered in the *Comparative Studies* part of the main body due to page limit. It can be observed that our PARD achieves consistently superior performance to well-established PML approaches.

Table A.1: Predictive performance of each comparing approach (mean±std. deviation) in terms of *Coverage*, where ●/○ indicates whether PARD is significantly superior/inferior to one comparing approach via paired *t*-test at 0.05 significance level. ↑ (↓) indicates the larger (smaller) the value, the better the performance. Best results are shown in boldface.

| Data sets     | $\gamma\%$ | <i>Coverage</i> ↓ |              |              |              |                      |                    |                    |
|---------------|------------|-------------------|--------------|--------------|--------------|----------------------|--------------------|--------------------|
|               |            | FPML              | PARVLS       | PML-NI       | PML-MD       | UPML-HL              | UPML-RL            | PARD               |
| YeastBP       |            | 0.437±0.020●      | 0.537±0.024● | 0.265±0.019● | 0.306±0.017● | 0.301±0.021●         | 0.394±0.018●       | <b>0.235±0.014</b> |
| YeastCC       |            | 0.173±0.014●      | 0.256±0.020● | 0.089±0.009● | 0.112±0.012● | 0.096±0.012●         | 0.127±0.012●       | <b>0.077±0.009</b> |
| YeastMF       |            | 0.185±0.013●      | 0.247±0.015● | 0.109±0.012● | 0.124±0.013● | 0.116±0.016●         | 0.144±0.011●       | <b>0.094±0.010</b> |
| Music_emotion |            | 0.433±0.009●      | 0.412±0.006● | 0.410±0.007● | 0.399±0.009  | <b>0.390±0.007</b> ○ | 0.406±0.009●       | 0.396±0.008        |
| Music_style   |            | 0.218±0.010●      | 0.209±0.009● | 0.198±0.009  | 0.203±0.009  | <b>0.195±0.008</b> ○ | 0.207±0.008●       | 0.199±0.011        |
| corel5k       | 100        | 0.343±0.014●      | 0.449±0.024● | 0.372±0.015● | 0.340±0.011● | 0.324±0.016●         | 0.314±0.017●       | <b>0.308±0.016</b> |
|               | 150        | 0.349±0.016●      | 0.414±0.016● | 0.388±0.015● | 0.347±0.012● | 0.328±0.017          | 0.322±0.016        | <b>0.321±0.014</b> |
|               | 200        | 0.351±0.014●      | 0.423±0.027● | 0.404±0.014● | 0.352±0.012● | 0.345±0.012●         | <b>0.329±0.015</b> | 0.332±0.015        |
|               | 250        | 0.356±0.016●      | 0.432±0.027● | 0.414±0.017● | 0.355±0.017● | 0.349±0.015●         | <b>0.332±0.016</b> | 0.337±0.015        |
| rcv1-s1       | 100        | 0.164±0.006●      | 0.304±0.013● | 0.173±0.010● | 0.151±0.007● | 0.146±0.006●         | 0.145±0.004●       | <b>0.135±0.006</b> |
|               | 150        | 0.165±0.007●      | 0.330±0.024● | 0.197±0.009● | 0.165±0.006● | 0.150±0.006●         | 0.149±0.005●       | <b>0.140±0.006</b> |
|               | 200        | 0.172±0.008●      | 0.350±0.023● | 0.214±0.008● | 0.173±0.006● | 0.156±0.009●         | 0.155±0.005●       | <b>0.148±0.005</b> |
|               | 250        | 0.183±0.008●      | 0.364±0.019● | 0.232±0.008● | 0.178±0.007● | 0.166±0.010●         | 0.163±0.005●       | <b>0.156±0.006</b> |
| Corel16k-s1   | 100        | 0.316±0.007●      | 0.391±0.008● | 0.346±0.012● | 0.317±0.010● | 0.304±0.008●         | 0.308±0.007●       | <b>0.298±0.009</b> |
|               | 150        | 0.324±0.007●      | 0.399±0.011● | 0.362±0.011● | 0.325±0.009● | 0.321±0.008●         | 0.314±0.008●       | <b>0.307±0.010</b> |
|               | 200        | 0.336±0.008●      | 0.427±0.010● | 0.375±0.013● | 0.330±0.010● | 0.348±0.010●         | <b>0.318±0.007</b> | 0.319±0.010        |
|               | 250        | 0.347±0.009●      | 0.470±0.008● | 0.387±0.013● | 0.338±0.008● | 0.349±0.012●         | 0.325±0.007●       | <b>0.322±0.010</b> |
| iaprtc12      | 100        | 0.328±0.005●      | 0.352±0.005● | 0.404±0.007● | 0.334±0.005● | 0.345±0.008●         | 0.349±0.004●       | <b>0.321±0.006</b> |
|               | 150        | 0.332±0.005●      | 0.359±0.006● | 0.374±0.007● | 0.346±0.006● | 0.349±0.009●         | 0.351±0.004●       | <b>0.327±0.006</b> |
|               | 200        | 0.339±0.005●      | 0.376±0.005● | 0.393±0.008● | 0.358±0.007● | 0.351±0.009●         | 0.357±0.006●       | <b>0.337±0.007</b> |
|               | 250        | 0.350±0.007●      | 0.392±0.006● | 0.413±0.008● | 0.367±0.007● | 0.368±0.010●         | 0.363±0.007●       | <b>0.346±0.006</b> |
| espgame       | 100        | 0.365±0.007●      | 0.398±0.007● | 0.404±0.007● | 0.371±0.007● | 0.372±0.008●         | 0.391±0.009●       | <b>0.353±0.006</b> |
|               | 150        | 0.369±0.007●      | 0.419±0.007● | 0.423±0.007● | 0.380±0.007● | 0.361±0.007●         | 0.377±0.007●       | <b>0.358±0.006</b> |
|               | 200        | 0.374±0.007●      | 0.434±0.006● | 0.435±0.008● | 0.387±0.007● | 0.398±0.010●         | 0.381±0.006●       | <b>0.362±0.007</b> |
|               | 250        | 0.384±0.007●      | 0.451±0.008● | 0.449±0.009● | 0.389±0.007● | 0.388±0.009●         | 0.388±0.007●       | <b>0.370±0.007</b> |

\*Corresponding author

Table A.2: Predictive performance of each comparing approach (mean $\pm$ std. deviation) in terms of *One-error*, where  $\bullet/\circ$  indicates whether PARD is significantly superior/inferior to one comparing approach via paired *t*-test at 0.05 significance level.  $\uparrow$  ( $\downarrow$ ) indicates the larger (smaller) the value, the better the performance. Best results are shown in boldface.

| Data sets     | $\gamma\%$ | <i>One-error</i> $\downarrow$ |                             |                                                     |                             |                                                     |                             |                                   |
|---------------|------------|-------------------------------|-----------------------------|-----------------------------------------------------|-----------------------------|-----------------------------------------------------|-----------------------------|-----------------------------------|
|               |            | FPML                          | PARVLS                      | PML-NI                                              | PML-MD                      | UPML-HL                                             | UPML-RL                     | PARD                              |
| YeastBP       |            | 0.833 $\pm$ 0.012 $\bullet$   | 0.977 $\pm$ 0.007 $\bullet$ | <b>0.670<math>\pm</math>0.025<math>\circ</math></b> | 0.749 $\pm$ 0.012 $\bullet$ | 0.690 $\pm$ 0.021                                   | 0.856 $\pm$ 0.012 $\bullet$ | 0.687 $\pm$ 0.014                 |
| YeastCC       |            | 0.863 $\pm$ 0.016 $\bullet$   | 0.961 $\pm$ 0.007 $\bullet$ | <b>0.768<math>\pm</math>0.023</b>                   | 0.796 $\pm$ 0.018 $\bullet$ | 0.772 $\pm$ 0.017                                   | 0.826 $\pm$ 0.013 $\bullet$ | 0.772 $\pm$ 0.020                 |
| YeastMF       |            | 0.933 $\pm$ 0.011 $\bullet$   | 0.983 $\pm$ 0.007 $\bullet$ | 0.838 $\pm$ 0.014                                   | 0.859 $\pm$ 0.014 $\bullet$ | 0.846 $\pm$ 0.010 $\bullet$                         | 0.900 $\pm$ 0.014 $\bullet$ | <b>0.837<math>\pm</math>0.018</b> |
| Music_emotion |            | 0.547 $\pm$ 0.022 $\bullet$   | 0.515 $\pm$ 0.020 $\bullet$ | 0.495 $\pm$ 0.024 $\bullet$                         | 0.412 $\pm$ 0.023           | 0.407 $\pm$ 0.025                                   | 0.431 $\pm$ 0.018 $\bullet$ | <b>0.403<math>\pm</math>0.011</b> |
| Music_style   |            | 0.393 $\pm$ 0.018 $\bullet$   | 0.372 $\pm$ 0.020 $\bullet$ | 0.352 $\pm$ 0.017 $\bullet$                         | 0.394 $\pm$ 0.020 $\bullet$ | 0.356 $\pm$ 0.017 $\bullet$                         | 0.405 $\pm$ 0.017 $\bullet$ | <b>0.337<math>\pm</math>0.015</b> |
| corel5k       | 100        | 0.642 $\pm$ 0.021 $\bullet$   | 0.736 $\pm$ 0.028 $\bullet$ | 0.642 $\pm$ 0.021 $\bullet$                         | 0.636 $\pm$ 0.028 $\bullet$ | 0.603 $\pm$ 0.020 $\bullet$                         | 0.610 $\pm$ 0.023 $\bullet$ | <b>0.583<math>\pm</math>0.023</b> |
|               | 150        | 0.652 $\pm$ 0.017 $\bullet$   | 0.732 $\pm$ 0.015 $\bullet$ | 0.664 $\pm$ 0.022 $\bullet$                         | 0.652 $\pm$ 0.020 $\bullet$ | 0.608 $\pm$ 0.021 $\bullet$                         | 0.609 $\pm$ 0.021 $\bullet$ | <b>0.589<math>\pm</math>0.016</b> |
|               | 200        | 0.656 $\pm$ 0.020 $\bullet$   | 0.747 $\pm$ 0.029 $\bullet$ | 0.681 $\pm$ 0.020 $\bullet$                         | 0.662 $\pm$ 0.019 $\bullet$ | 0.607 $\pm$ 0.015                                   | 0.610 $\pm$ 0.017           | <b>0.598<math>\pm</math>0.019</b> |
|               | 250        | 0.660 $\pm$ 0.018 $\bullet$   | 0.750 $\pm$ 0.027 $\bullet$ | 0.697 $\pm$ 0.021 $\bullet$                         | 0.663 $\pm$ 0.024 $\bullet$ | 0.608 $\pm$ 0.018                                   | 0.609 $\pm$ 0.018           | <b>0.602<math>\pm</math>0.016</b> |
| rcv1-s1       | 100        | 0.447 $\pm$ 0.017 $\bullet$   | 0.602 $\pm$ 0.030 $\bullet$ | 0.425 $\pm$ 0.022                                   | 0.497 $\pm$ 0.019 $\bullet$ | <b>0.413<math>\pm</math>0.025<math>\circ</math></b> | 0.466 $\pm$ 0.011 $\bullet$ | 0.430 $\pm$ 0.019                 |
|               | 150        | 0.458 $\pm$ 0.016 $\bullet$   | 0.609 $\pm$ 0.028 $\bullet$ | 0.449 $\pm$ 0.022 $\bullet$                         | 0.513 $\pm$ 0.022 $\bullet$ | 0.428 $\pm$ 0.024                                   | 0.464 $\pm$ 0.015 $\bullet$ | <b>0.424<math>\pm</math>0.018</b> |
|               | 200        | 0.463 $\pm$ 0.015 $\bullet$   | 0.622 $\pm$ 0.025 $\bullet$ | 0.466 $\pm$ 0.017 $\bullet$                         | 0.524 $\pm$ 0.022 $\bullet$ | 0.434 $\pm$ 0.016                                   | 0.470 $\pm$ 0.014 $\bullet$ | <b>0.433<math>\pm</math>0.017</b> |
|               | 250        | 0.472 $\pm$ 0.020 $\bullet$   | 0.623 $\pm$ 0.021 $\bullet$ | 0.495 $\pm$ 0.017 $\bullet$                         | 0.535 $\pm$ 0.023 $\bullet$ | 0.440 $\pm$ 0.027                                   | 0.490 $\pm$ 0.022 $\bullet$ | <b>0.435<math>\pm</math>0.020</b> |
| Corel16k-s1   | 100        | 0.580 $\pm$ 0.015 $\bullet$   | 0.716 $\pm$ 0.017 $\bullet$ | 0.587 $\pm$ 0.015 $\bullet$                         | 0.607 $\pm$ 0.017 $\bullet$ | 0.577 $\pm$ 0.020 $\bullet$                         | 0.602 $\pm$ 0.009 $\bullet$ | <b>0.567<math>\pm</math>0.020</b> |
|               | 150        | 0.589 $\pm$ 0.013 $\bullet$   | 0.715 $\pm$ 0.017 $\bullet$ | 0.610 $\pm$ 0.021 $\bullet$                         | 0.617 $\pm$ 0.017 $\bullet$ | 0.582 $\pm$ 0.018 $\bullet$                         | 0.605 $\pm$ 0.016 $\bullet$ | <b>0.572<math>\pm</math>0.023</b> |
|               | 200        | 0.590 $\pm$ 0.014             | 0.720 $\pm$ 0.015 $\bullet$ | 0.624 $\pm$ 0.021 $\bullet$                         | 0.624 $\pm$ 0.017 $\bullet$ | 0.604 $\pm$ 0.015 $\bullet$                         | 0.609 $\pm$ 0.013 $\bullet$ | <b>0.580<math>\pm</math>0.024</b> |
|               | 250        | 0.600 $\pm$ 0.016             | 0.721 $\pm$ 0.014 $\bullet$ | 0.635 $\pm$ 0.019 $\bullet$                         | 0.631 $\pm$ 0.019 $\bullet$ | 0.603 $\pm$ 0.018 $\bullet$                         | 0.611 $\pm$ 0.013 $\bullet$ | <b>0.593<math>\pm</math>0.022</b> |
| iaprtc12      | 100        | 0.458 $\pm$ 0.009 $\bullet$   | 0.462 $\pm$ 0.015 $\bullet$ | 0.448 $\pm$ 0.015 $\bullet$                         | 0.461 $\pm$ 0.014 $\bullet$ | 0.444 $\pm$ 0.013 $\bullet$                         | 0.525 $\pm$ 0.016 $\bullet$ | <b>0.433<math>\pm</math>0.020</b> |
|               | 150        | 0.460 $\pm$ 0.009 $\bullet$   | 0.467 $\pm$ 0.014 $\bullet$ | 0.467 $\pm$ 0.017 $\bullet$                         | 0.481 $\pm$ 0.016 $\bullet$ | 0.449 $\pm$ 0.009 $\bullet$                         | 0.531 $\pm$ 0.010 $\bullet$ | <b>0.438<math>\pm</math>0.013</b> |
|               | 200        | 0.463 $\pm$ 0.012 $\bullet$   | 0.474 $\pm$ 0.011 $\bullet$ | 0.485 $\pm$ 0.013 $\bullet$                         | 0.494 $\pm$ 0.013 $\bullet$ | 0.444 $\pm$ 0.013                                   | 0.531 $\pm$ 0.013 $\bullet$ | <b>0.443<math>\pm</math>0.013</b> |
|               | 250        | 0.469 $\pm$ 0.016 $\bullet$   | 0.485 $\pm$ 0.011 $\bullet$ | 0.507 $\pm$ 0.015 $\bullet$                         | 0.503 $\pm$ 0.012 $\bullet$ | 0.463 $\pm$ 0.014 $\bullet$                         | 0.540 $\pm$ 0.010 $\bullet$ | <b>0.450<math>\pm</math>0.013</b> |
| espgame       | 100        | 0.608 $\pm$ 0.012 $\bullet$   | 0.637 $\pm$ 0.014 $\bullet$ | 0.618 $\pm$ 0.011 $\bullet$                         | 0.618 $\pm$ 0.014 $\bullet$ | 0.601 $\pm$ 0.014 $\bullet$                         | 0.648 $\pm$ 0.012 $\bullet$ | <b>0.589<math>\pm</math>0.014</b> |
|               | 150        | 0.609 $\pm$ 0.010 $\bullet$   | 0.644 $\pm$ 0.014 $\bullet$ | 0.642 $\pm$ 0.012 $\bullet$                         | 0.630 $\pm$ 0.013 $\bullet$ | 0.596 $\pm$ 0.013                                   | 0.655 $\pm$ 0.012 $\bullet$ | <b>0.594<math>\pm</math>0.013</b> |
|               | 200        | 0.608 $\pm$ 0.011 $\bullet$   | 0.656 $\pm$ 0.015 $\bullet$ | 0.654 $\pm$ 0.009 $\bullet$                         | 0.640 $\pm$ 0.011 $\bullet$ | 0.626 $\pm$ 0.016 $\bullet$                         | 0.664 $\pm$ 0.011 $\bullet$ | <b>0.598<math>\pm</math>0.013</b> |
|               | 250        | 0.611 $\pm$ 0.016 $\bullet$   | 0.678 $\pm$ 0.018 $\bullet$ | 0.677 $\pm$ 0.009 $\bullet$                         | 0.652 $\pm$ 0.010 $\bullet$ | 0.613 $\pm$ 0.012 $\bullet$                         | 0.672 $\pm$ 0.009 $\bullet$ | <b>0.604<math>\pm</math>0.012</b> |

Table A.3: Predictive performance of each comparing approach (mean $\pm$ std. deviation) in terms of *Hamming loss*, where  $\bullet/\circ$  indicates whether PARD is significantly superior/inferior to one comparing approach via paired *t*-test at 0.05 significance level.  $\uparrow$  ( $\downarrow$ ) indicates the larger (smaller) the value, the better the performance. Best results are shown in boldface.

| Data sets     | $\gamma\%$ | <i>Hamming loss</i> $\downarrow$                    |                                                     |                                   |                                   |                                                     |                                   |                                   |
|---------------|------------|-----------------------------------------------------|-----------------------------------------------------|-----------------------------------|-----------------------------------|-----------------------------------------------------|-----------------------------------|-----------------------------------|
|               |            | FPML                                                | PARVLS                                              | PML-NI                            | PML-MD                            | UPML-HL                                             | UPML-RL                           | PARD                              |
| YeastBP       |            | 0.025 $\pm$ 0.001 $\bullet$                         | 0.025 $\pm$ 0.001 $\bullet$                         | 0.026 $\pm$ 0.001 $\bullet$       | 0.026 $\pm$ 0.002 $\bullet$       | 0.025 $\pm$ 0.001 $\bullet$                         | 0.026 $\pm$ 0.001 $\bullet$       | <b>0.024<math>\pm</math>0.001</b> |
| YeastCC       |            | 0.154 $\pm$ 0.002 $\bullet$                         | 0.027 $\pm$ 0.002 $\bullet$                         | 0.029 $\pm$ 0.002 $\bullet$       | 0.029 $\pm$ 0.002 $\bullet$       | 0.026 $\pm$ 0.002 $\bullet$                         | 0.027 $\pm$ 0.002 $\bullet$       | <b>0.025<math>\pm</math>0.002</b> |
| YeastMF       |            | <b>0.025<math>\pm</math>0.002</b>                   | 0.026 $\pm$ 0.002 $\bullet$                         | 0.031 $\pm$ 0.002 $\bullet$       | 0.028 $\pm$ 0.002 $\bullet$       | <b>0.025<math>\pm</math>0.002</b>                   | 0.026 $\pm$ 0.002 $\bullet$       | <b>0.025<math>\pm</math>0.002</b> |
| Music_emotion |            | 0.217 $\pm$ 0.004 $\bullet$                         | 0.214 $\pm$ 0.006 $\bullet$                         | 0.212 $\pm$ 0.005 $\bullet$       | 0.218 $\pm$ 0.005 $\bullet$       | <b>0.193<math>\pm</math>0.004<math>\circ</math></b> | 0.210 $\pm$ 0.005 $\bullet$       | 0.196 $\pm$ 0.006                 |
| Music_style   |            | 0.123 $\pm$ 0.003 $\bullet$                         | 0.121 $\pm$ 0.003 $\bullet$                         | <b>0.115<math>\pm</math>0.003</b> | 0.143 $\pm$ 0.004 $\bullet$       | <b>0.115<math>\pm</math>0.003</b>                   | 0.125 $\pm$ 0.003 $\bullet$       | 0.117 $\pm$ 0.006                 |
| corel5k       | 100        | 0.117 $\pm$ 0.002 $\bullet$                         | 0.134 $\pm$ 0.006 $\bullet$                         | 0.129 $\pm$ 0.004 $\bullet$       | 0.117 $\pm$ 0.005 $\bullet$       | <b>0.112<math>\pm</math>0.003</b>                   | 0.113 $\pm$ 0.003 $\bullet$       | <b>0.112<math>\pm</math>0.003</b> |
|               | 150        | 0.117 $\pm$ 0.003 $\bullet$                         | 0.136 $\pm$ 0.006 $\bullet$                         | 0.130 $\pm$ 0.004 $\bullet$       | 0.117 $\pm$ 0.003 $\bullet$       | <b>0.112<math>\pm</math>0.003</b>                   | 0.113 $\pm$ 0.003 $\bullet$       | <b>0.112<math>\pm</math>0.002</b> |
|               | 200        | 0.117 $\pm$ 0.003 $\bullet$                         | 0.138 $\pm$ 0.005 $\bullet$                         | 0.131 $\pm$ 0.005 $\bullet$       | 0.117 $\pm$ 0.003 $\bullet$       | <b>0.113<math>\pm</math>0.003</b>                   | <b>0.113<math>\pm</math>0.003</b> | <b>0.113<math>\pm</math>0.003</b> |
|               | 250        | 0.117 $\pm$ 0.003 $\bullet$                         | 0.140 $\pm$ 0.006 $\bullet$                         | 0.131 $\pm$ 0.004 $\bullet$       | 0.117 $\pm$ 0.004 $\bullet$       | <b>0.113<math>\pm</math>0.003</b>                   | <b>0.113<math>\pm</math>0.003</b> | <b>0.113<math>\pm</math>0.003</b> |
| rcv1-s1       | 100        | 0.099 $\pm$ 0.002                                   | 0.118 $\pm$ 0.004 $\bullet$                         | 0.100 $\pm$ 0.003                 | 0.106 $\pm$ 0.003 $\bullet$       | <b>0.095<math>\pm</math>0.002<math>\circ</math></b> | 0.108 $\pm$ 0.002 $\bullet$       | 0.098 $\pm$ 0.003                 |
|               | 150        | 0.099 $\pm$ 0.002 $\circ$                           | 0.123 $\pm$ 0.004 $\bullet$                         | 0.103 $\pm$ 0.004                 | 0.107 $\pm$ 0.003 $\bullet$       | <b>0.096<math>\pm</math>0.003<math>\circ</math></b> | 0.108 $\pm$ 0.002 $\bullet$       | 0.104 $\pm$ 0.003                 |
|               | 200        | <b>0.099<math>\pm</math>0.002<math>\circ</math></b> | 0.125 $\pm$ 0.003 $\bullet$                         | 0.106 $\pm$ 0.004 $\bullet$       | 0.108 $\pm$ 0.003 $\bullet$       | 0.101 $\pm$ 0.003                                   | 0.107 $\pm$ 0.002 $\bullet$       | 0.103 $\pm$ 0.004                 |
|               | 250        | <b>0.101<math>\pm</math>0.003<math>\circ</math></b> | 0.126 $\pm$ 0.003 $\bullet$                         | 0.110 $\pm$ 0.005                 | 0.109 $\pm$ 0.003                 | 0.125 $\pm$ 0.005 $\bullet$                         | 0.109 $\pm$ 0.002 $\bullet$       | 0.108 $\pm$ 0.002                 |
| Corel16k-s1   | 100        | 0.121 $\pm$ 0.002 $\bullet$                         | 0.139 $\pm$ 0.003 $\bullet$                         | 0.125 $\pm$ 0.002 $\bullet$       | <b>0.117<math>\pm</math>0.002</b> | <b>0.117<math>\pm</math>0.002</b>                   | 0.118 $\pm$ 0.001 $\bullet$       | <b>0.117<math>\pm</math>0.001</b> |
|               | 150        | 0.121 $\pm$ 0.002 $\bullet$                         | 0.136 $\pm$ 0.002 $\bullet$                         | 0.126 $\pm$ 0.003 $\bullet$       | <b>0.117<math>\pm</math>0.002</b> | <b>0.117<math>\pm</math>0.001</b>                   | 0.118 $\pm$ 0.001 $\bullet$       | <b>0.117<math>\pm</math>0.001</b> |
|               | 200        | 0.121 $\pm$ 0.002 $\bullet$                         | 0.135 $\pm$ 0.002 $\bullet$                         | 0.125 $\pm$ 0.003 $\bullet$       | <b>0.117<math>\pm</math>0.002</b> | <b>0.117<math>\pm</math>0.001</b>                   | 0.118 $\pm$ 0.001 $\bullet$       | <b>0.117<math>\pm</math>0.002</b> |
|               | 250        | 0.120 $\pm$ 0.002 $\bullet$                         | 0.135 $\pm$ 0.002 $\bullet$                         | 0.125 $\pm$ 0.003 $\bullet$       | <b>0.117<math>\pm</math>0.002</b> | <b>0.117<math>\pm</math>0.002</b>                   | <b>0.117<math>\pm</math>0.002</b> | <b>0.117<math>\pm</math>0.001</b> |
| iaprtc12      | 100        | 0.143 $\pm$ 0.002 $\bullet$                         | 0.140 $\pm$ 0.002 $\bullet$                         | 0.144 $\pm$ 0.002 $\bullet$       | 0.146 $\pm$ 0.002 $\bullet$       | 0.138 $\pm$ 0.002                                   | 0.151 $\pm$ 0.002 $\bullet$       | <b>0.137<math>\pm</math>0.002</b> |
|               | 150        | 0.143 $\pm$ 0.002 $\bullet$                         | 0.140 $\pm$ 0.002                                   | 0.146 $\pm$ 0.002 $\bullet$       | 0.149 $\pm$ 0.002 $\bullet$       | <b>0.138<math>\pm</math>0.003</b>                   | 0.151 $\pm$ 0.002 $\bullet$       | 0.139 $\pm$ 0.002                 |
|               | 200        | 0.143 $\pm$ 0.002 $\bullet$                         | 0.141 $\pm$ 0.002                                   | 0.148 $\pm$ 0.002 $\bullet$       | 0.150 $\pm$ 0.002 $\bullet$       | <b>0.139<math>\pm</math>0.002<math>\circ</math></b> | 0.151 $\pm$ 0.002 $\bullet$       | 0.141 $\pm$ 0.002                 |
|               | 250        | 0.144 $\pm$ 0.002 $\bullet$                         | <b>0.143<math>\pm</math>0.001<math>\circ</math></b> | 0.150 $\pm$ 0.003 $\bullet$       | 0.151 $\pm$ 0.002 $\bullet$       | 0.148 $\pm$ 0.003                                   | 0.151 $\pm$ 0.002 $\bullet$       | 0.146 $\pm$ 0.002                 |
| espgame       | 100        | 0.133 $\pm$ 0.002 $\bullet$                         | 0.135 $\pm$ 0.002 $\bullet$                         | 0.141 $\pm$ 0.002 $\bullet$       | 0.130 $\pm$ 0.002 $\bullet$       | 0.131 $\pm$ 0.002 $\bullet$                         | 0.132 $\pm$ 0.002 $\bullet$       | <b>0.129<math>\pm</math>0.002</b> |
|               | 150        | 0.133 $\pm$ 0.003 $\bullet$                         | 0.133 $\pm$ 0.002 $\bullet$                         | 0.142 $\pm$ 0.003 $\bullet$       | 0.131 $\pm$ 0.002 $\bullet$       | 0.132 $\pm$ 0.002 $\bullet$                         | 0.132 $\pm$ 0.002 $\bullet$       | <b>0.130<math>\pm</math>0.002</b> |
|               | 200        | 0.132 $\pm$ 0.002 $\bullet$                         | 0.133 $\pm$ 0.002 $\bullet$                         | 0.143 $\pm$ 0.002 $\bullet$       | <b>0.131<math>\pm</math>0.002</b> | 0.132 $\pm$ 0.002                                   | 0.132 $\pm$ 0.002 $\bullet$       | <b>0.131<math>\pm</math>0.002</b> |
|               | 250        | 0.132 $\pm$ 0.002                                   | 0.134 $\pm$ 0.002 $\bullet$                         | 0.143 $\pm$ 0.003 $\bullet$       | 0.132 $\pm$ 0.002                 | <b>0.131<math>\pm</math>0.002</b>                   | 0.132 $\pm$ 0.002 $\bullet$       | <b>0.131<math>\pm</math>0.002</b> |

## Appendix B Derivation of The Variational Lower Bound

The variational lower bound of the log-likelihood (i.e. Eq. (2) in the main body) is derived as follows

$$\begin{aligned}
\log p_\theta(\mathbf{s}|\mathbf{x}) &= \log \int p_\theta(\mathbf{s}, \mathbf{y}|\mathbf{x}) d\mathbf{y} \\
&= \log \int p_\theta(\mathbf{s}|\mathbf{x}, \mathbf{y}) p_\theta(\mathbf{y}|\mathbf{x}) d\mathbf{y} \\
&= \log \int q_\phi(\mathbf{y}|\mathbf{x}, \mathbf{s}) \frac{p_\theta(\mathbf{s}|\mathbf{x}, \mathbf{y}) p_\theta(\mathbf{y}|\mathbf{x})}{q_\phi(\mathbf{y}|\mathbf{x}, \mathbf{s})} d\mathbf{y} \\
&\geq \mathbb{E}_{q_\phi(\mathbf{y}|\mathbf{x}, \mathbf{s})} [\log \frac{p_\theta(\mathbf{s}|\mathbf{x}, \mathbf{y}) p_\theta(\mathbf{y}|\mathbf{x})}{q_\phi(\mathbf{y}|\mathbf{x}, \mathbf{s})}] \\
&= \mathcal{L}(\mathbf{x}, \mathbf{s}; \theta, \phi).
\end{aligned}$$

## Appendix C Derivation of The KL-Divergence Term's Closed-Form Solution

With mean-field approximation technique, closed-form solution of the KL-divergence term can be derived as follows

$$\begin{aligned}
&KL[q_\phi(\mathbf{y}|\mathbf{x}, \mathbf{s})||p_\theta(\mathbf{y}|\mathbf{x})] \\
&= \mathbb{E}_{q_\phi(\mathbf{y}|\mathbf{x}, \mathbf{s})} [\log q_\phi(\mathbf{y}|\mathbf{x}, \mathbf{s}) - \log p_\theta(\mathbf{y}|\mathbf{x})] \\
&= \mathbb{E}_{q_\phi(\mathbf{y}|\mathbf{x}, \mathbf{s})} [\sum_{k=1}^t \log q_\phi(y_k|\mathbf{x}, \mathbf{s}) - \sum_{k=1}^t \log p_\theta(y_k|\mathbf{x})] \\
&= \sum_{k=1}^t \mathbb{E}_{q_\phi(\mathbf{y}|\mathbf{x}, \mathbf{s})} [\log \frac{q_\phi(y_k|\mathbf{x}, \mathbf{s})}{p_\theta(y_k|\mathbf{x})}] \\
&= \sum_{k=1}^t \mathbb{E}_{q_\phi(y_k|\mathbf{x}, \mathbf{s})} [\log \frac{q_\phi(y_k|\mathbf{x}, \mathbf{s})}{p_\theta(y_k|\mathbf{x})}] \\
&= \sum_{k=1}^t KL[q_\phi(y_k|\mathbf{x}, \mathbf{s})||p_\theta(y_k|\mathbf{x})] \\
&= \sum_{k=1}^t p_\phi^{y_k} \log \frac{p_\phi^{y_k}}{p_\theta^{y_k}} + (1 - p_\phi^{y_k}) \log \frac{1 - p_\phi^{y_k}}{1 - p_\theta^{y_k}}.
\end{aligned}$$

Althouth mean-field approximation would restrict model capacity, it is a routine in VAE-related literatures [17] to make graphical model tractable. A natural direction for future work is to investigate whether it is possible to compute the KL-divergence term without mean-field approximation.
